# Supplementary material for: Characterising two-pathogen competition in spatially structured environments
Source: PubMed Central journal article supplement — Sci Rep. 2015 Jan 20;5:7895. doi: 10.1038/srep07895 (PMC4298724; doi:10.1038/srep07895), 2015-01-20
Supplement: srep07895-s1.pdf [file srep07895-s1.pdf]

# Characterizing two-pathogen competition in spatially structured environments

Chiara Poletto<sup>1,2,\*</sup>, Sandro Meloni<sup>3,4</sup>, Ashleigh Van Metre<sup>1,2,5</sup>, Vittoria Colizza<sup>1,2,6</sup>, Yamir Moreno<sup>3,4,6</sup>, Alessandro Vespignani<sup>6,7</sup>

September 8, 2014

<sup>1</sup>Sorbonne Universités, UPMC Univ Paris 06, UMR-S 1136, Institut Pierre Louis d'Epidémiologie et de Santé Publique, F-75013, Paris, France

<sup>2</sup>INSERM, UMR-S 1136, Institut Pierre Louis d'Epidémiologie et de Santé Publique, F-75013, Paris, France

<sup>3</sup>Institute for Biocomputation and Physics of Complex Systems, University of Zaragoza, Zaragoza, Spain

<sup>4</sup>Department of Theoretical Physics, University of Zaragoza, Zaragoza, Spain

<sup>5</sup>Wofford College, South Carolina, USA

<sup>6</sup>ISI Foundation, Torino, Italy

<sup>7</sup>Laboratory for the Modeling of Biological and Socio-technical Systems, Northeastern University, Boston MA, USA

## 1 Figure S1: Competition between the two strains as a function of $r$ and $\sigma$

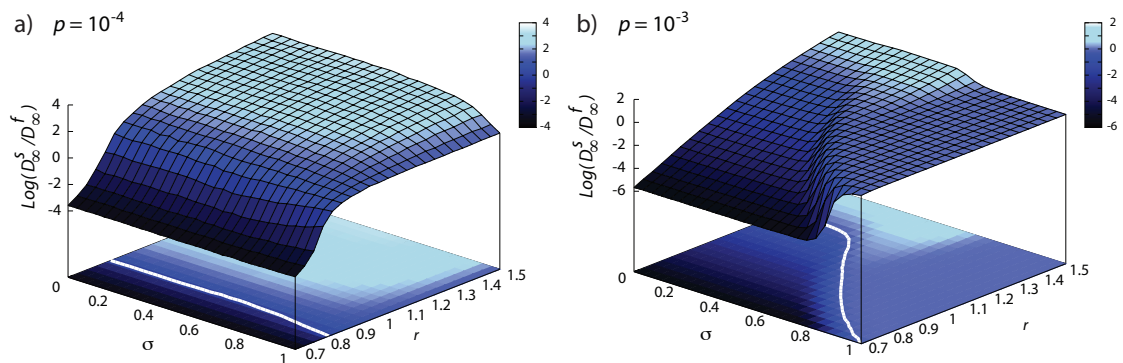

Figure S1: Competition between the two strains as a function of  $r$  and  $\sigma$  for two distinct values of travelling probability  $p$ . The quantity in the  $z$ -axis is the logarithm of the ratio  $D_\infty^s/D_\infty^f$ . Colour code is proportional to the value in the  $z$ -axis, and the heat-map in the horizontal plane indicates the same quantity for the sake of visualisation. The white curve indicates the parameter region corresponding to the crossover where the two strains co-dominate, that is identified by  $\text{log}(D_\infty^s/D_\infty^f) = 0$ . The parameter  $\tau$  is equal to 2.
